# Supplementary material for: AzaBODIPY based coordination polymers
Source: Royal Society of Chemistry journal article supplement (doi:10.1039/c6ce02582j), 2017-01-01
Supplement: c6ce02582j1.pdf [file c6ce02582j1.pdf]

## Electronic Supplementary Information

### AzaBODIPY based coordination polymers

Antoine Mazel, Stéphane A. Baudron\* and Mir Wais Hosseini\*

Laboratoire de Tectonique Moléculaire, UMR Uds-CNRS 7140, icFRC

Institut Le Bel, Université de Strasbourg

4 rue Blaise Pascal, CS 90032, F-67081 Strasbourg cedex, France

Fax: (+) 33 3 68 85 13 25

E-mail: [hosseini@unistra.fr](mailto:hosseini@unistra.fr) ; [sbaudron@unistra.fr](mailto:sbaudron@unistra.fr)

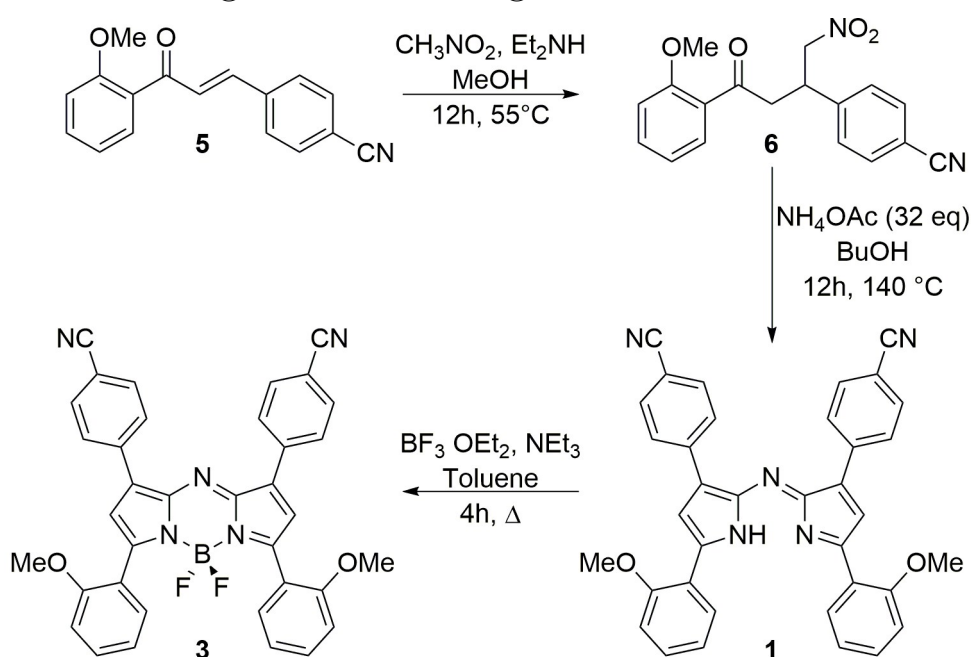

**Scheme ES11** Synthetic route for the preparation of azaBODIPY 3.

### Synthesis

Compounds 2 and 4 were synthesized as reported.<sup>1</sup> Chalcone 5 was prepared as described.<sup>2</sup> Nitromethane is a potentially explosive reagent, special care should be taken when handling it.

$^1\text{H}$ - and  $^{13}\text{C}$ -NMR spectra were recorded at  $25^\circ\text{C}$  on a Bruker AV300 (300 MHz), AV400 (400 MHz) or AV500 (500 MHz) with the deuterated solvent as the internal reference. NMR chemical shifts and  $J$  values are given in parts per million (ppm) and in Hertz, respectively. Mass spectrometry and elemental analyses were performed by the Service commun d'analyse (University of Strasbourg). UV-visible spectra were recorded on a Perkin Elmer Lambda

650S spectrophotometer. Emission and excitation spectra were recorded on a Perkin Elmer LS 55 spectrometer.

**Compound 6:** To a suspension of **5** (5.79 g, 0.028 mol) in MeOH (30 mL), Et<sub>2</sub>NH (8.0 mL, 0.077 mol) was first added followed by dropwise addition of nitromethane (8.2 mL, 0.153 mol). The mixture was refluxed at 55 °C overnight. The yellow solution was concentrated under vacuum and 2 mL of toluene were added (to prevent explosion due to the presence of nitromethane). Purification by column chromatography (SiO<sub>2</sub>, CH<sub>2</sub>Cl<sub>2</sub>) yielded the Michael addition product **6** in 77% yield (5.46 g).  $\delta_{\text{H}}$  (300 MHz, CDCl<sub>3</sub>): 7.64 (m, 3H), 7.49 (m, 1H), 7.41 (m, 2H), 6.99 (m, 2H), 4.74 (m, 2H), 4.26 (m, 1H), 3.89 (s, 3H), 3.45 (m, 2H). IR (ATR)  $\nu/\text{cm}^{-1}$ : 2222.9 ( $\nu_{\text{CN}}$ ).

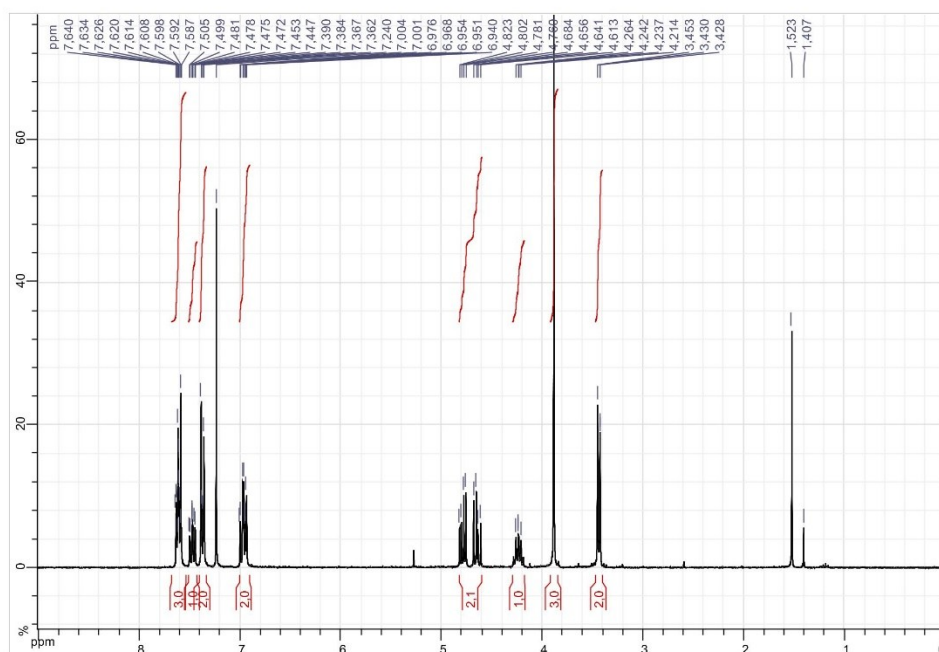

**Fig. ESI1** <sup>1</sup>H-NMR spectrum of compound **6** in CDCl<sub>3</sub>.

**Azadipyrrin 1:** Ammonium acetate (45.7 g, 0.59 mol) was added to a solution of **6** (6 g, 0.0185 mol) in *n*-BuOH (514 mL). Upon refluxing for 4 days, the white suspension became clear and a dark blue precipitate formed. Upon filtration, **1** was obtained as a dark blue powder in 17% yield (0.90 g). Crystals suitable for X-ray diffraction were obtained by slow diffusion of *n*-pentane vapor into a CHCl<sub>3</sub> solution of **1**.  $\delta_{\text{H}}$  (300 MHz, THF-*d*<sub>8</sub>): 13.05 (s, 1H), 8.21 (m, 3H), 7.80 (d,  $J = 8.7$  Hz, 2H), 7.60 (s, 1 H), 7.45 (td,  $J = 7.8$  and 1.9 Hz, 2H), 7.17 (d,  $J = 8.7$  Hz, 1H), 7.11 (t,  $J = 7.5$  Hz, 1H), 3.99 (s, 3H).  $\delta_{\text{C}}$  (125 MHz, THF-*d*<sub>8</sub>) 158.4, 154.3, 148.5, 138.7, 138.2, 131.9, 131.7, 129.2, 121.0, 120.7, 119.5, 118.4, 112.1, 111.2, 55.6.

IR (ATR)  $\nu/\text{cm}^{-1}$ : 2223.1 ( $\nu_{\text{CN}}$ ).  $\lambda_{\text{max}}(\text{CHCl}_3)/\text{nm}$  ( $\epsilon/\text{mol.L}^{-1}.\text{cm}^{-1}$ ): 349 (28200), 621 (50600).

HRMS (ESI)  $m/z$ :  $[\text{M}+\text{H}]^+$  calcd. for  $\text{C}_{36}\text{H}_{26}\text{N}_5\text{O}_2$ : 560.2081; found: 560.2031.

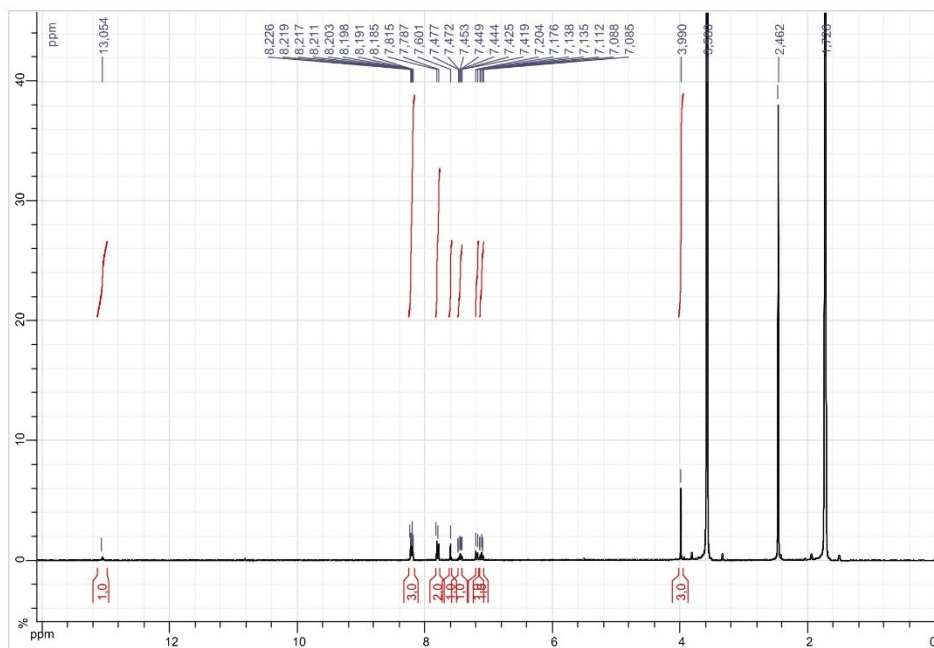

**Fig. ESI2**  $^1\text{H}$ -NMR spectrum of azadipyrrin **1** in  $\text{THF-d}_8$ .

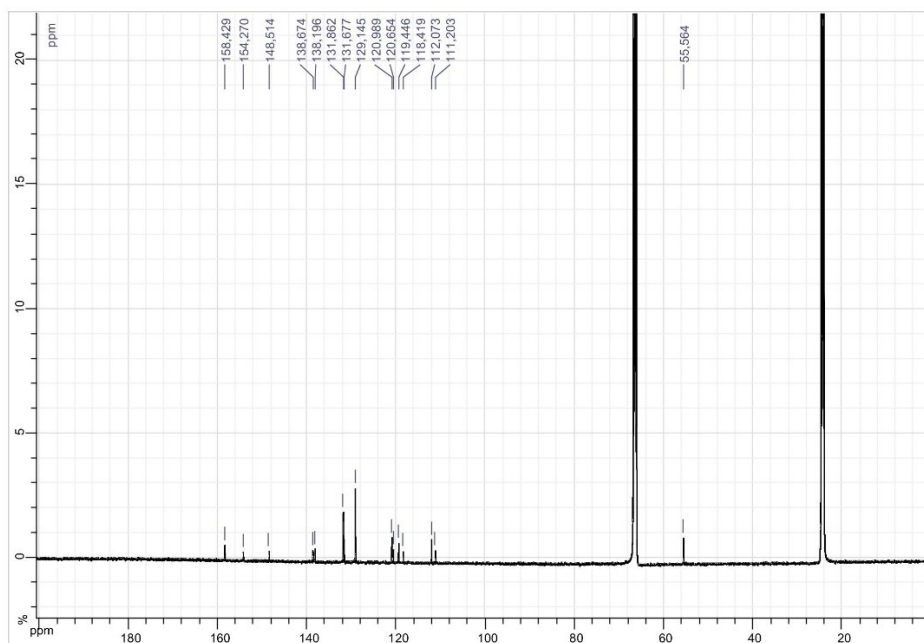

**Fig. ESI3**  $^{13}\text{C}$ -NMR spectrum of azadipyrrin **1** in  $\text{THF-d}_8$ .

**AzaBODIPY 3:** To a suspension of **1** (0.80 g, 0.00143 mol) in toluene (500 mL) under argon, Et<sub>3</sub>N (9.6 mL, 0.0715 mol) and BF<sub>3</sub>.OEt<sub>2</sub> (17.6 mL, 0.143 mol) were added dropwise. The mixture was refluxed for 4h. BF<sub>3</sub>.OEt<sub>2</sub> was quenched by addition of cold EtOH. Solvents were evaporated under vacuum and MeOH was added. The precipitate formed was recovered by filtration to afford **3** in 98% yield (0.78 g). Crystals suitable for X-Ray diffraction were obtained by slow diffusion of *n*-pentane into a solution of **3** in dioxane.  $\delta_{\text{H}}$  (500 MHz, THF-d<sub>8</sub>): 8.25 (d, *J* = 8.5 Hz, 4H), 7.86 (m, 6H), 7.41 (m, 2H), 7.31 (s, 2H), 7.09 (d, *J* = 8.0 Hz, 2H), 6.97 (td, *J* = 0.8 and 7.7 Hz, 2H), 3.86 (s, 6H).  $\delta_{\text{C}}$  (125 MHz, THF-d<sub>8</sub>) 159.2, 158.7, 145.6, 140.9, 137.2, 133.0, 132.8, 132.3, 130.1, 123.8, 121.3, 120.7, 118.8, 113.3, 111.8, 55.9.  $\delta_{\text{F}}$  (280 MHz, THF-d<sub>8</sub>) -136.2 (q, *J* = 29.5 Hz). IR (ATR)  $\nu/\text{cm}^{-1}$ : 2223.8 ( $\nu\text{CN}$ ).  $\lambda_{\text{max}}(\text{CHCl}_3)/\text{nm}$  ( $\epsilon/\text{mol.L}^{-1}.\text{cm}^{-1}$ ): 331 (27800), 664 (89400). HRMS (ESI) *m/z*: [M]<sup>+</sup> calcd. for C<sub>36</sub>H<sub>24</sub>BF<sub>2</sub>N<sub>5</sub>O<sub>2</sub>: 607.1992; found: 607.1993.

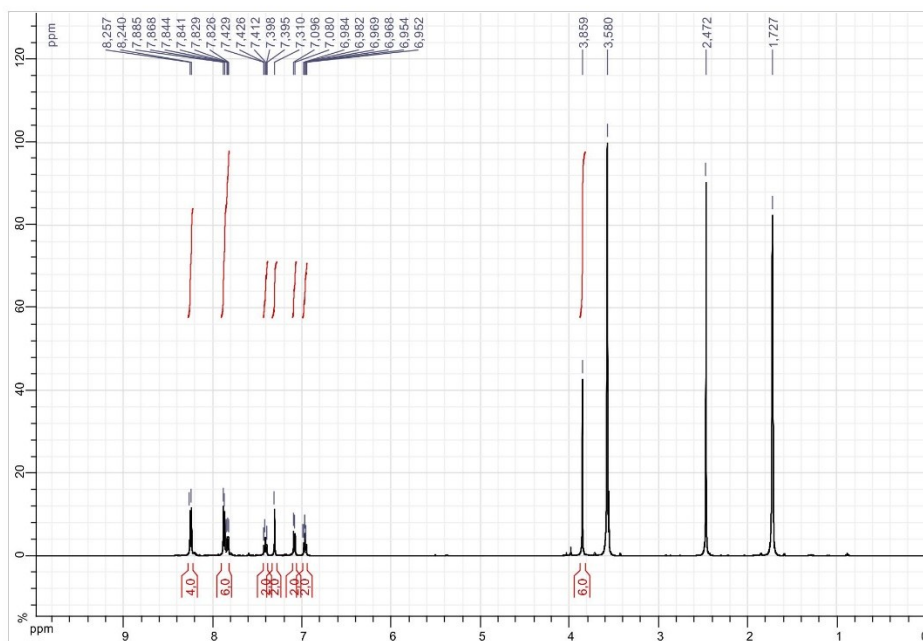

**Fig. ES14** <sup>1</sup>H-NMR spectrum of azaBODIPY **3** in THF-d<sub>8</sub>.

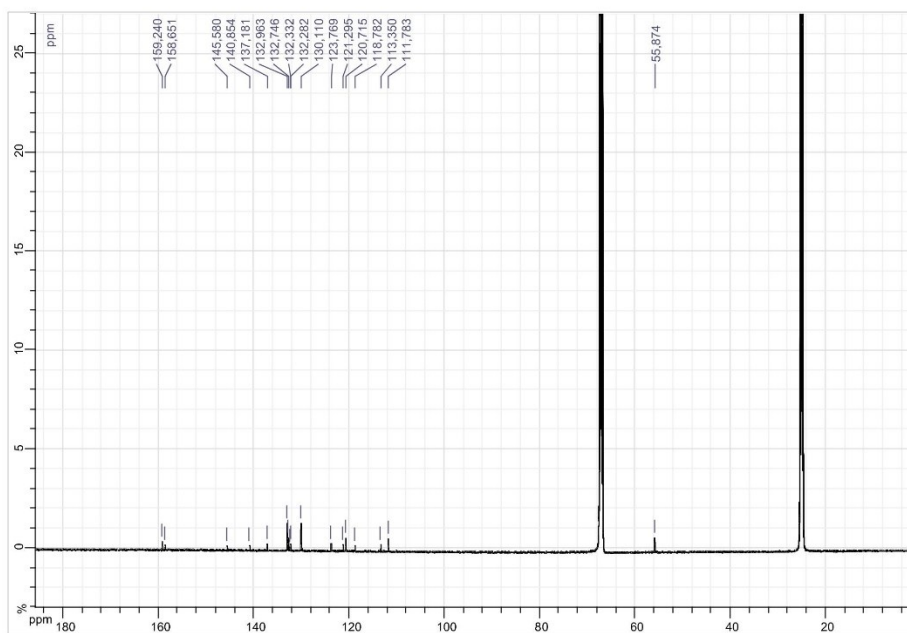

Fig. ESI5  $^{13}\text{C}$ -NMR spectrum of azaBODIPY **3** in THF- $\text{d}_8$ .

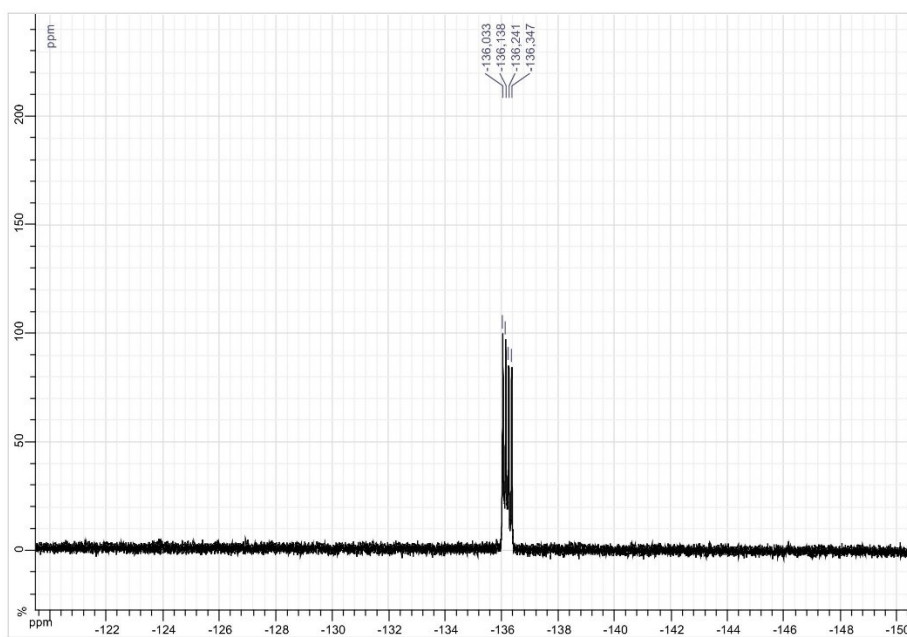

Fig. ESI6  $^{19}\text{F}$ -NMR spectrum of azaBODIPY **3** in THF- $\text{d}_8$ .

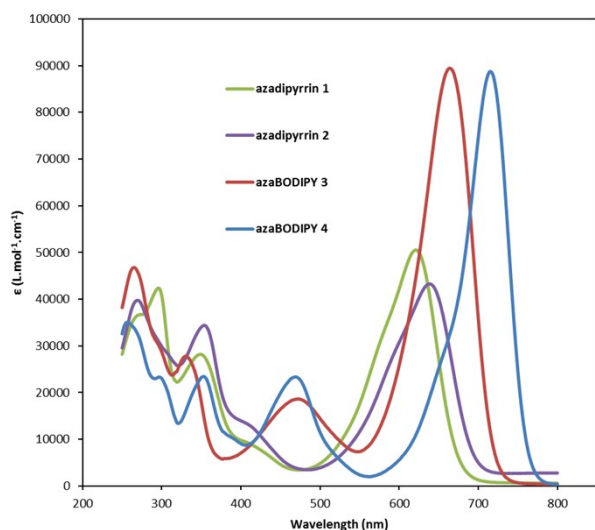

**Fig. ESI 7.** Absorption spectra of compounds **1-4** in  $\text{CHCl}_3$  solution.

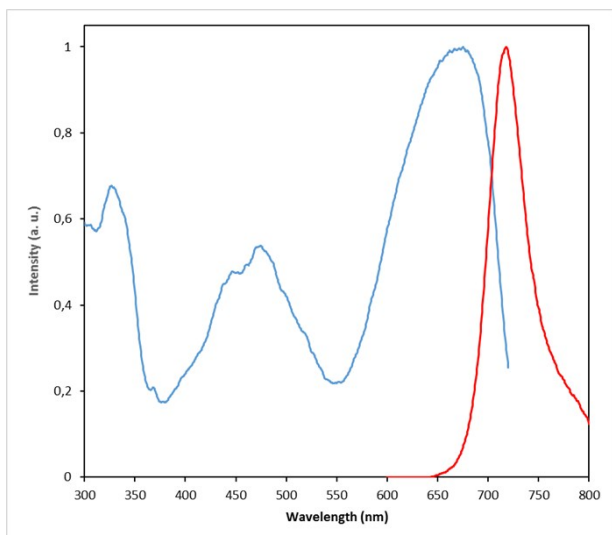

**Fig. ESI 8.** Excitation (blue line,  $\lambda_{\text{em}} = 718 \text{ nm}$ ) and emission (red line,  $\lambda_{\text{ex}} = 580 \text{ nm}$ ) spectra of azaBODIPY **3** in  $\text{CHCl}_3$  solution.

**Network 7:** A  $\text{CHCl}_3$  solution (3 mL) of  $\text{Ag}(\text{BF}_4)$  (4 mg, 0.021 mmol) was first layered by a 1/1  $\text{CHCl}_3/\text{THF}$  (3 mL) mixture and then by a THF solution (8 mL) of azaBODIPY **3** (10 mg, 0.016 mmol). Crystals of **7** were harvested after few days. IR (ATR)  $\nu/\text{cm}^{-1}$ : 2250.2 ( $\nu\text{CN}$ ). Found: C, 50.13; H, 3.17; N, 7.65.  $(\text{C}_{36}\text{H}_{24}\text{AgB}_2\text{F}_6\text{N}_5\text{O}_2)_2(\text{C}_4\text{H}_8\text{O})(\text{CHCl}_3)$  requires C, 51.50; H, 3.19; N, 7.80.

**Network 8:** A  $\text{CHCl}_3$  solution (3 mL) of  $\text{Ag}(\text{BF}_4)$  (4 mg, 0.021 mmol) was first layered by a 1/1  $\text{CHCl}_3/\text{THF}$  (3 mL) mixture and then by a THF solution (10 mL) of azaBODIPY **4** (5 mg, 0.008 mmol). Crystals of **8** were harvested after few days. IR (ATR)  $\nu/\text{cm}^{-1}$ : 2244.8, 2264.9 ( $\nu\text{CN}$ ).

## X-Ray diffraction

Single-crystal data (Tables ESI1 and ESI2) were collected on a Bruker SMART CCD diffractometer with Mo-K $\alpha$  radiation at 173 K. The structures were solved using SHELXS-97 and refined by full matrix least-squares on  $F^2$  using SHELXL-2014 with anisotropic thermal parameters for all non-hydrogen atoms.<sup>3</sup> The hydrogen atoms were introduced at calculated positions and not refined (riding model). In the structure of **4**, one CHCl<sub>3</sub> molecule is disordered over two positions. In the structure of **7**, highly disordered THF and CHCl<sub>3</sub> molecules are present, the SQUEEZE command has been employed to account for the corresponding electron density.<sup>4</sup> Furthermore, the Ag(I) cation was found to be disordered over two positions. Refinement on data collected on different crystals with various exposure time consistently led to a structure featuring this positional disorder of the metal cation. In the structure of **8**, one THF molecule is disordered over two positions. The hydrogen atoms on this molecule have not been introduced but are taken into account in the compound formula. CCDC 1522701-1522705 contain the supplementary crystallographic data for compounds **1**, **3-4** and **7-8**. These data can be obtained free of charge via [www.ccdc.cam.ac.uk/data\\_request/cif](http://www.ccdc.cam.ac.uk/data_request/cif).

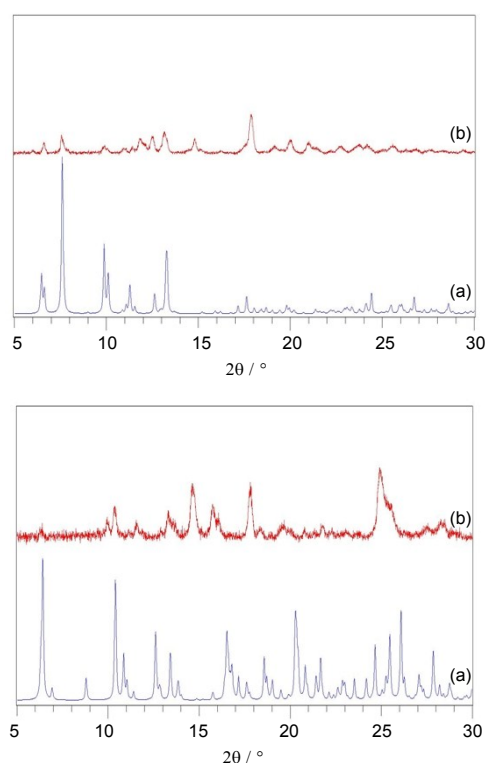

**Fig. ESI9** Simulated (a) and experimental (b) PRXD pattern for network **7** (top) and **8** (bottom) showing the loss of crystallinity of the compounds upon removal from the mother liquor.

Table ESI1 Crystallographic data for compounds **1**, **3** and **(4)<sub>2</sub>(CHCl<sub>3</sub>)**

|                                                                 | <b>1</b>                                                      | <b>3</b>                                                                      | <b>(4)<sub>2</sub>(CHCl<sub>3</sub>)</b>                                                                     |
|-----------------------------------------------------------------|---------------------------------------------------------------|-------------------------------------------------------------------------------|--------------------------------------------------------------------------------------------------------------|
| Formula                                                         | C <sub>36</sub> H <sub>25</sub> N <sub>5</sub> O <sub>2</sub> | C <sub>36</sub> H <sub>24</sub> BF <sub>2</sub> N <sub>5</sub> O <sub>2</sub> | C <sub>73</sub> H <sub>49</sub> B <sub>2</sub> Cl <sub>3</sub> F <sub>4</sub> N <sub>10</sub> O <sub>4</sub> |
| FW                                                              | 559.61                                                        | 607.41                                                                        | 1334.19                                                                                                      |
| Crystal system                                                  | Triclinic                                                     | Monoclinic                                                                    | Monoclinic                                                                                                   |
| Space group                                                     | <i>P</i> -1                                                   | <i>P</i> 2 <sub>1</sub> / <i>c</i>                                            | <i>P</i> 2 <sub>1</sub> / <i>c</i>                                                                           |
| <i>a</i> / Å                                                    | 9.1444(8)                                                     | 16.9698(8)                                                                    | 16.8878(11)                                                                                                  |
| <i>b</i> / Å                                                    | 12.2700(8)                                                    | 12.9677(7)                                                                    | 13.8408(13)                                                                                                  |
| <i>c</i> / Å                                                    | 13.4648(10)                                                   | 13.8541(8)                                                                    | 14.4153(13)                                                                                                  |
| <i>α</i> / °                                                    | 110.287(2)                                                    |                                                                               |                                                                                                              |
| <i>β</i> / °                                                    | 95.118(3)                                                     | 108.953(2)                                                                    | 109.557(2)                                                                                                   |
| <i>γ</i> / °                                                    | 90.687(3)                                                     |                                                                               |                                                                                                              |
| <i>V</i> / Å <sup>3</sup>                                       | 1409.92(19)                                                   | 2883.4(3)                                                                     | 3175.1(5)                                                                                                    |
| <i>Z</i>                                                        | 2                                                             | 4                                                                             | 2                                                                                                            |
| <i>T</i> / K                                                    | 173(2)                                                        | 173(2)                                                                        | 173(2)                                                                                                       |
| <i>μ</i> / mm <sup>-1</sup>                                     | 0.084                                                         | 0.097                                                                         | 0.217                                                                                                        |
| Refls. coll.                                                    | 22455                                                         | 33370                                                                         | 35368                                                                                                        |
| Ind. refls. (Rint)                                              | 7512 (0.0539)                                                 | 8394 (0.0520)                                                                 | 9068 (0.0767)                                                                                                |
| <i>R</i> <sub>1</sub> ( <i>I</i> >2σ( <i>I</i> )) <sup>a</sup>  | 0.0770                                                        | 0.0642                                                                        | 0.0761                                                                                                       |
| <i>wR</i> <sub>2</sub> ( <i>I</i> >2σ( <i>I</i> )) <sup>a</sup> | 0.1371                                                        | 0.1339                                                                        | 0.1762                                                                                                       |
| <i>R</i> <sub>1</sub> (all data) <sup>a</sup>                   | 0.1637                                                        | 0.1289                                                                        | 0.1405                                                                                                       |
| <i>wR</i> <sub>2</sub> (all data) <sup>a</sup>                  | 0.1643                                                        | 0.1576                                                                        | 0.2059                                                                                                       |
| GOF                                                             | 1.036                                                         | 1.032                                                                         | 1.039                                                                                                        |

$$^a R_1 = \sum ||F_o| - |F_c|| / \sum |F_o|; wR_2 = [\sum w(F_o^2 - F_c^2)^2 / \sum wF_o^4]^{1/2}$$

Table ESI2 Crystallographic data for compounds **7** and **8**

|                                                                 | <b>7</b>                                                                                      | <b>8</b>                                                                                                        |
|-----------------------------------------------------------------|-----------------------------------------------------------------------------------------------|-----------------------------------------------------------------------------------------------------------------|
| Formula                                                         | C <sub>36</sub> H <sub>24</sub> AgB <sub>2</sub> F <sub>6</sub> N <sub>5</sub> O <sub>2</sub> | C <sub>148</sub> H <sub>104</sub> Ag <sub>2</sub> B <sub>6</sub> F <sub>16</sub> N <sub>20</sub> O <sub>9</sub> |
| FW                                                              | 802.09                                                                                        | 2891.11                                                                                                         |
| Crystal system                                                  | Monoclinic                                                                                    | Orthorhombic                                                                                                    |
| Space group                                                     | <i>C</i> 2/ <i>c</i>                                                                          | <i>P</i> <i>n</i> <i>n</i> <i>a</i>                                                                             |
| <i>a</i> / Å                                                    | 29.3110(13)                                                                                   | 14.4266(5)                                                                                                      |
| <i>b</i> / Å                                                    | 15.3218(5)                                                                                    | 16.3190(6)                                                                                                      |
| <i>c</i> / Å                                                    | 18.7508(7)                                                                                    | 27.6414(11)                                                                                                     |
| <i>β</i> / °                                                    | 110.666(3)                                                                                    |                                                                                                                 |
| <i>V</i> / Å <sup>3</sup>                                       |                                                                                               | 6507.6(4)                                                                                                       |
| <i>Z</i>                                                        | 8                                                                                             | 2                                                                                                               |
| <i>T</i> / K                                                    | 173(2)                                                                                        | 173(2)                                                                                                          |
| <i>μ</i> / mm <sup>-1</sup>                                     | 0.576                                                                                         | 0.394                                                                                                           |
| Refls. coll.                                                    | 96561                                                                                         | 71454                                                                                                           |
| Ind. refls. (Rint)                                              | 11741 (0.0317)                                                                                | 9549 (0.0878)                                                                                                   |
| <i>R</i> <sub>1</sub> ( <i>I</i> >2σ( <i>I</i> )) <sup>a</sup>  | 0.0532                                                                                        | 0.0635                                                                                                          |
| <i>wR</i> <sub>2</sub> ( <i>I</i> >2σ( <i>I</i> )) <sup>a</sup> | 0.1600                                                                                        | 0.1782                                                                                                          |
| <i>R</i> <sub>1</sub> (all data) <sup>a</sup>                   | 0.0843                                                                                        | 0.1281                                                                                                          |
| <i>wR</i> <sub>2</sub> (all data) <sup>a</sup>                  | 0.1822                                                                                        | 0.2147                                                                                                          |
| GOF                                                             | 1.042                                                                                         | 1.054                                                                                                           |

$$^a R_1 = \sum ||F_o| - |F_c|| / \sum |F_o|; wR_2 = [\sum w(F_o^2 - F_c^2)^2 / \sum wF_o^4]^{1/2}$$



## References

- 1 L. Jiao, Y. Wu, S. Wang, X. Hu, P. Zhang, C. Yu, K. Cong, Q. Meng, E. Hao and M. G. H. Vicente, *J. Org. Chem.*, 2014, **79**, 1830.
- 2 J. R. Merchant and A. S. U. Choughuley, *Chem. Ber.*, 1962, **95**, 1792.
- 3 G. M. Sheldrick, *Acta Cryst.*, 2008, **A64**, 112.
- 4 A. L. Spek, PLATON, The university of Utrecht, Utrecht , The Netherlands, 1999.
